# Supplementary material for: Effect of buffer on direct lithium extraction from Tibetan brine by formed titanium-based lithium ion sieves
Source: Royal Society of Chemistry journal article supplement (doi:10.1039/d4nj02205j), 2024-01-01
Supplement: d4nj02205j1.pdf [file d4nj02205j1.pdf]

## Supporting Information

### Effect of Buffer on Direct Lithium Extraction Process of Tibetan Brine by Formed Titanium-based Lithium Ion Sieves

Chunmei Tang,<sup>‡</sup> Lin Zhang,<sup>‡</sup> Jiayu Li, Huihui Yue, Wenjun Sun, Qun Cui <sup>\*</sup>, Haiyan  
Wang <sup>\*</sup>

College of Chemical Engineering, Nanjing Tech University, Nanjing 211816, China

\* Corresponding author: cuiqun@njtech.edu.cn. Tel: +86 025 83587188.

haiyanwang@njtech.edu.cn. Tel: +86 025 83587188.

<sup>‡</sup> These authors contributed equally to this work.

**Table S1. A summary of effect of adding buffer on lithium adsorption process by titanium-based lithium ion sieves**

| Adsorbent                                                  | Initial concentration of Li <sup>+</sup> (g/L) | Buffer                     | Initial pH value | Adjusted pH value | Adsorption condition | Adsorption capacity of Li <sup>+</sup> (mg/g) | Increasing ratio of adsorption capacity (%) | Recovery ratio of Li <sup>+</sup> (%) | Reference |
|------------------------------------------------------------|------------------------------------------------|----------------------------|------------------|-------------------|----------------------|-----------------------------------------------|---------------------------------------------|---------------------------------------|-----------|
| H <sub>2</sub> TiO <sub>3</sub>                            | 1.950 (brine)                                  | Ammonia                    | -                | 10.1              | 25 °C, 6 h           | 16.68                                         | -                                           | -                                     | [1]       |
| H <sub>2</sub> TiO <sub>3</sub>                            | 1.56 (brine)                                   | Ca(OH) <sub>2</sub>        | 2.8              | 8.8               | 25 °C, 5 g/L, 24 h   | ~33                                           | 94.1                                        | 10                                    | [2]       |
| H <sub>2</sub> TiO <sub>3</sub>                            | 1.63 (brine)                                   | NaHCO <sub>3</sub><br>NaOH | 6.7              | 6.5<br>~8         | 25 °C, 20 g/L, 24 h  | 32.6<br>31.5                                  | -<br>-                                      | 40<br>38.6                            | [3]       |
| PVB-HTO (H <sub>2</sub> TiO <sub>3</sub> )                 | 0.2 (Simulated brine)                          | Ammonia                    | 7.2              | 9.2               | 30 °C, 10 g/L, 5 h   | ~12                                           | 60                                          | 50                                    | [4]       |
| P-HTO-NF (H <sub>4</sub> Ti <sub>5</sub> O <sub>12</sub> ) | 1.0 (Simulated brine)                          | NaOH                       | 8                | 11                | 25 °C, 1 g/L, 12 h   | 59.1                                          | 61.9                                        | 20                                    | [5]       |
| H <sub>4</sub> Ti <sub>5</sub> O <sub>12</sub>             | 0.166 (Simulated brine)                        | KOH                        | -                | 13                | 25 °C, 2 g/L, 4 h    | 16.83                                         | -                                           | 20                                    | [6]       |
| H <sub>2</sub> TiO <sub>3</sub>                            | 0.093 (Shale gas produced water)               | KHCO <sub>3</sub>          | 7.0              | 6.4               | 30 °C, 3 g/L, 24 h   | 18.32                                         | -                                           | 59                                    | [7]       |
| PSF-HTO (H <sub>2</sub> TiO <sub>3</sub> )                 | 0.025 (Geothermal water)                       | NaOH                       | 8.8              | 12                | 60 °C, 1 g/L, 2 h    | 22.66                                         | ~126.6                                      | 88.7                                  | [8]       |
| PVC-HTO (H <sub>2</sub> TiO <sub>3</sub> )                 | 0.025 (Geothermal water)                       | NaOH                       | -                | 12                | 55 °C, 2 g/L, 12 h   | ~9                                            | -                                           | ~70                                   | [9]       |

According to Table S1, when NaOH,  $\text{NH}_3\cdot\text{H}_2\text{O}$ ,  $\text{Ca}(\text{OH})_2$  and KOH were added in the brine or simulated brine, the pH value of the solution increased greatly due to the addition of a large amount of  $\text{OH}^-$ , while the pH value of the solution basically remained unchanged after the addition of  $\text{NaHCO}_3$  and  $\text{KHCO}_3$ . In addition, except geothermal water and shale gas produced water that with low concentration of  $\text{Li}^+$ , the recovery ratio of  $\text{Li}^+$  in the brine or simulated brine was poor.

**Table S2. Effect of the buffer on the pH value of Tibetan Brine**

| Buffer   | /    | NaOH | NaHCO <sub>3</sub> | NH <sub>3</sub> ·H <sub>2</sub> O | Ca(OH) <sub>2</sub> | KHCO <sub>3</sub> |
|----------|------|------|--------------------|-----------------------------------|---------------------|-------------------|
| pH value | 8.26 | 9.84 | 7.84               | 9.74                              | 12.20               | 7.70              |

**Table S3. Main cations content and physical properties of Tibetan Brine and Tibetan Brine-****NaHCO<sub>3</sub>**

| Type                             | Main cations content, mg/L |                  |                |                 |                  | pH value | viscosity, mPa/S |
|----------------------------------|----------------------------|------------------|----------------|-----------------|------------------|----------|------------------|
|                                  | Li <sup>+</sup>            | Mg <sup>2+</sup> | K <sup>+</sup> | Na <sup>+</sup> | Ca <sup>2+</sup> |          |                  |
| Tibetan Brine                    | 879.4                      | 3778.5           | 5997.3         | 26901           | 268.3            | 8.26     | 1.93             |
| Tibetan Brine-NaHCO <sub>3</sub> | 877.3                      | 3643.2           | 5985.1         | 30903           | 210.6            | 7.84     | 1.99             |

**Table S4. Fitting results of lithium adsorption on HTO-P in Tibetan Brine-NaHCO<sub>3</sub> and Tibetan**

| <b>Brine by different isotherm models</b> |                                     |                                        |                      |
|-------------------------------------------|-------------------------------------|----------------------------------------|----------------------|
| <b>Isotherm model</b>                     | <b>parameter</b>                    | <b>Tibetan Brine-NaHCO<sub>3</sub></b> | <b>Tibetan Brine</b> |
| Langmuir                                  | q <sub>m</sub> , mg/g               | 28.82                                  | 22.22                |
|                                           | K <sub>L</sub> , mg/g               | 0.0044                                 | 0.0027               |
|                                           | R <sup>2</sup>                      | 0.998                                  | 0.993                |
| Freundlich                                | K <sub>F</sub> , L/g                | 2.70                                   | 0.78                 |
|                                           | n                                   | 3.14                                   | 2.24                 |
|                                           | R <sup>2</sup>                      | 0.975                                  | 0.971                |
| D-R                                       | q <sub>0</sub> , mg/g               | 23.63                                  | 15.35                |
|                                           | β, mol <sup>2</sup> /J <sup>2</sup> | 0.00621                                | 0.00687              |
|                                           | R <sup>2</sup>                      | 0.993                                  | 0.970                |

**Table S5. Fitting results of lithium adsorption on HTO-P in Tibetan Brine-NaHCO<sub>3</sub> and Tibetan**

| <b>Brine by different kinetic models</b> |                            |                                        |                      |
|------------------------------------------|----------------------------|----------------------------------------|----------------------|
| <b>Kinetic model</b>                     | <b>Parameter</b>           | <b>Tibetan Brine-NaHCO<sub>3</sub></b> | <b>Tibetan Brine</b> |
| PFO                                      | q <sub>e</sub> , mg/g      | 21.168                                 | 13.366               |
|                                          | k <sub>1</sub> , 1/h       | 0.406                                  | 0.392                |
|                                          | R <sup>2</sup>             | 0.981                                  | 0.915                |
| PSO                                      | q <sub>e</sub> , mg/g      | 22.256                                 | 14.735               |
|                                          | k <sub>2</sub> , g/(mg·h)  | 0.038                                  | 0.025                |
|                                          | R <sup>2</sup>             | 0.993                                  | 0.995                |
| MO                                       | q <sub>e</sub> , mg/g      | 21.914                                 | 13.996               |
|                                          | k <sub>1</sub> ', 1/h      | 0.116                                  | 0.0759               |
|                                          | k <sub>2</sub> ', g/(mg·h) | 0.022                                  | 0.0161               |
|                                          | R <sup>2</sup>             | 0.990                                  | 0.992                |

**Table S6. O 1s peak parameters of HTO-P, HTO-P(Li)-NaHCO<sub>3</sub> and HTO-P(Li)**

| Adsorbent                    | Peak                |              |                                    |              |                     |              |
|------------------------------|---------------------|--------------|------------------------------------|--------------|---------------------|--------------|
|                              | O-Ti                |              | HO <sup>-</sup> /Li-O <sup>-</sup> |              | H <sub>2</sub> O    |              |
|                              | Binding energy (eV) | Atomic ratio | Binding energy (eV)                | Atomic ratio | Binding energy (eV) | Atomic ratio |
| HTO-P                        | 530.10              | 74.19%       | 531.60                             | 21.85%       | 532.80              | 3.96%        |
| HTO-P(Li)-NaHCO <sub>3</sub> | 529.88              | 46.47%       | 531.21                             | 46.89%       | 532.74              | 6.64%        |
| HTO-P(Li)                    | 529.91              | 55.83%       | 531.36                             | 33.05%       | 532.50              | 11.11%       |

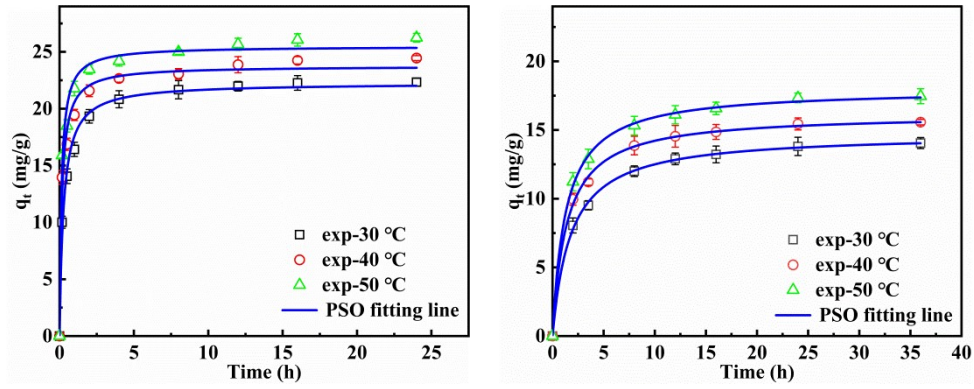

**Fig. S1 Adsorption rate curves of Li<sup>+</sup> on HTO-P in (a) Tibetan Brine-NaHCO<sub>3</sub> and (b) Tibetan Brine under different adsorption temperatures**

**Table S7. Fitting results of lithium adsorption on HTO-P in Tibetan Brine-NaHCO<sub>3</sub> and Tibetan**

**Brine under different adsorption temperatures by PSO model**

| Temperature, °C | Tibetan Brine-NaHCO <sub>3</sub> |                           |                | Tibetan Brine         |                           |                |
|-----------------|----------------------------------|---------------------------|----------------|-----------------------|---------------------------|----------------|
|                 | q <sub>e</sub> , mg/g            | k <sub>2</sub> , g/(mg·h) | R <sup>2</sup> | q <sub>e</sub> , mg/g | k <sub>2</sub> , g/(mg·h) | R <sup>2</sup> |
| 30              | 22.256                           | 0.038                     | 0.993          | 14.735                | 0.025                     | 0.995          |
| 40              | 23.749                           | 0.061                     | 0.986          | 16.171                | 0.046                     | 0.998          |
| 50              | 25.489                           | 0.067                     | 0.987          | 17.991                | 0.043                     | 0.999          |

## Reference

- 1 Z.-Y. Ji, F.-J. Yang, Y.-Y. Zhao, J. Liu, N. Wang and J.-S. Yuan, *Chem. Eng. J.*, 2017, 328, 768-775.
- 2 S. Wang, P. Li, X. Zhang, S. Zheng and Y. Zhang, *Hydrometallurgy*, 2017, 174, 21-28.
- 3 R. Chitrakar, Y. Makita, K. Ooi and A. Sonoda, *Dalton Trans.*, 2014, 43, 8933-8939.
- 4 Y. Zhang, J. Liu, Y. Yang, S. Lin and P. Li, *Sep. Purif. Technol.*, 2021, 267, 118613.
- 5 S. Wei, Y. Wei, T. Chen, C. Liu and Y. Tang, *Chem. Eng. J.*, 2020, 379, 122407.
- 6 B. Zhao, M. Guo, F. Qian, Z. Qian, N. Xu, Z. Wu and Z. Liu, *RSC Adv.*, 2020, 10, 35153-35163.
- 7 Y. Jang and E. Chung, *Ind. Eng. Chem. Res.*, 2018, 57, 8381-8387.
- 8 K. Zhao, B. Tong, X. Yu, Y. Guo, Y. Xie and T. Deng, *Chem. Eng. J.*, 2022, 430, 131423.
- 9 H. Lin, X. Yu, M. Li, J. Duo, Y. Guo and T. Deng, *ACS Appl. Mater. Interfaces*, 2019, 11, 26364-26372.
